# Supplementary material
Source: PubMed Central journal article supplement (PMC2770016)

# Sugiura et al., Supplemental Figure S1

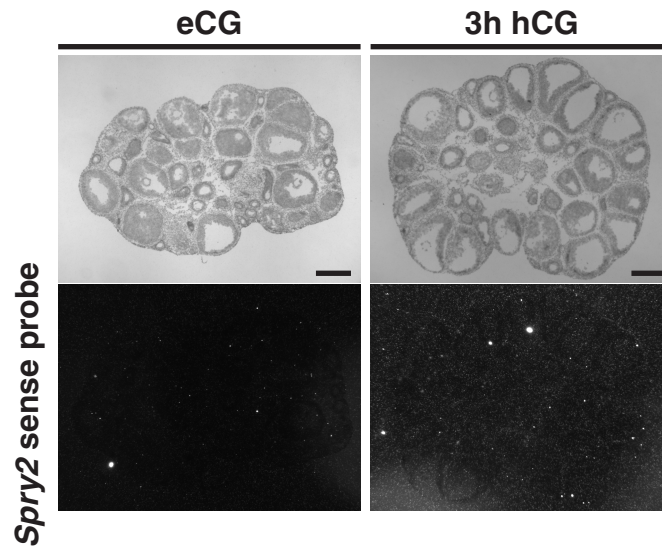

Supplement: supp_109.078485_biolreprod.109.078485-1.pdf [file supp_109.078485_biolreprod.109.078485-1.pdf]
